# Supplementary material for: Identification of Wheat Septoria tritici Resistance Genes in Wheat Germplasm Using Molecular Markers
Source: MDPI journal article supplement (doi:10.3390/plants13081113), 2024-04-16
Supplement: s1 [file s1]

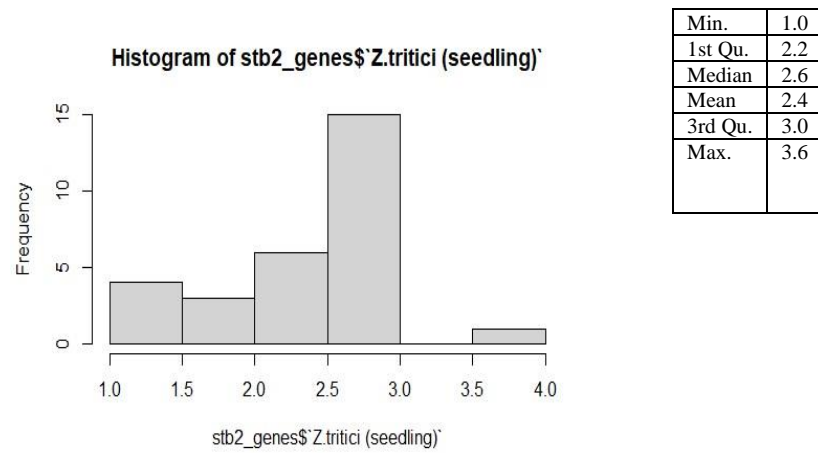

A

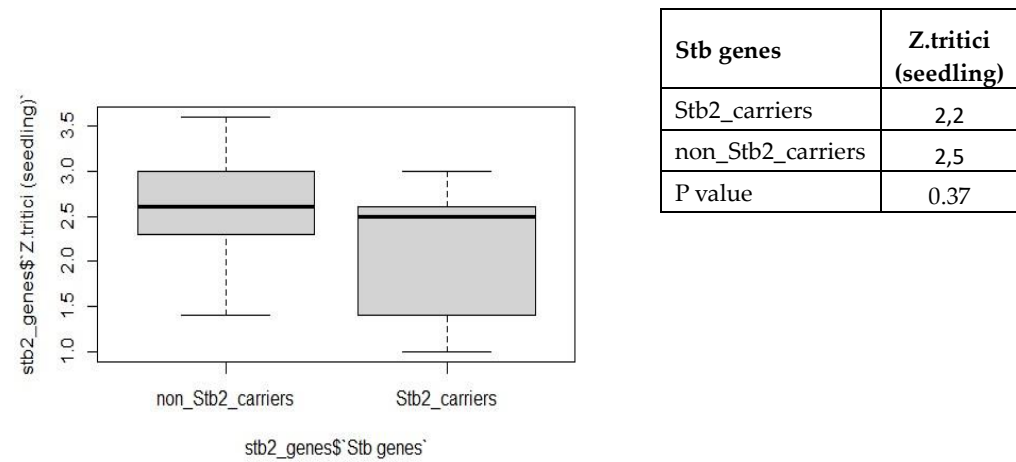

B

**Supplementary Figure S1.** The general distribution of the Stb2 variable (A) and the boxplot for the Stb2 variable. (B)

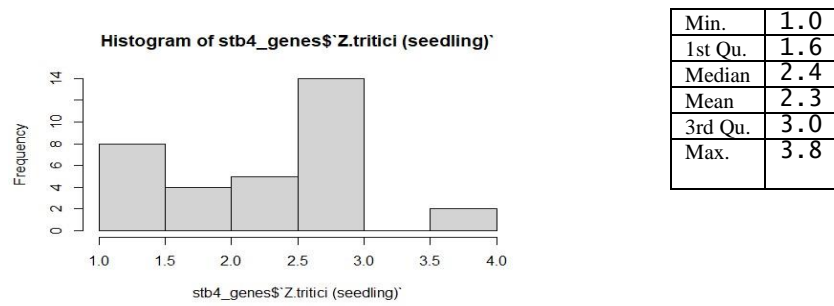

A

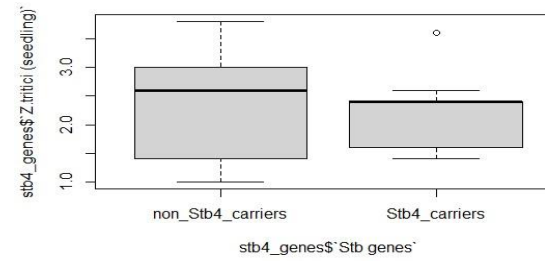

B

| Stb genes         | Z.tritici (seedling) |
|-------------------|----------------------|
| Stb4_carriers     | 2,2                  |
| non_Stb4_carriers | 2,3                  |
| P value           | 0.51                 |

**Supplementary Figure S2.** The general distribution of the Stb4 variable (A) and the boxplot for the Stb4 variable. (B)

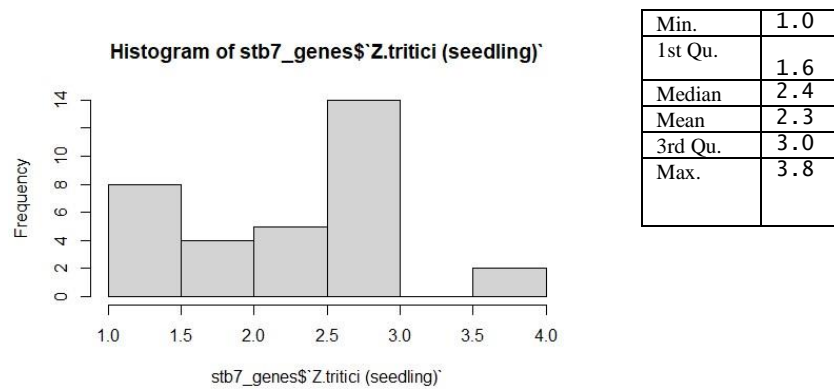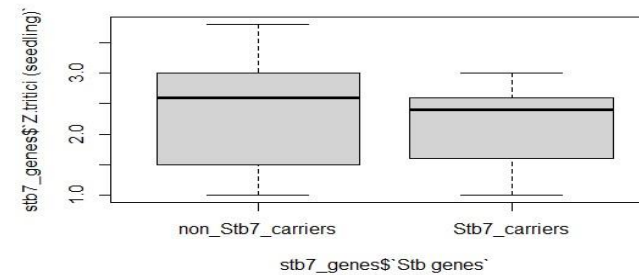

| Stb genes         | Z.tritici (seedling) |
|-------------------|----------------------|
| Stb7_carriers     | 2.28                 |
| non_Stb7_carriers | 2,26                 |
| P value           | 0.62                 |

**Supplementary Figure S3.** The general distribution of the Stb7 variable (A) and the boxplot for the Stb7 variable (B).

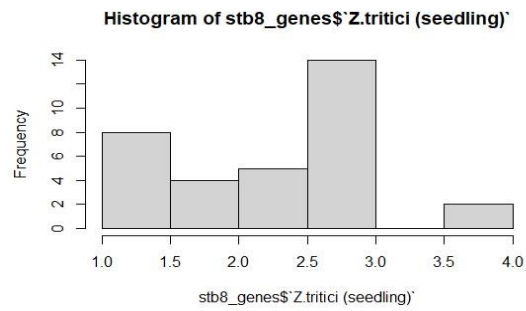

|         |     |
|---------|-----|
| Min.    | 1.0 |
| 1st Qu. | 1.6 |
| Median  | 2.4 |
| Mean    | 2.3 |
| 3rd Qu. | 3.0 |
| Max.    | 3.8 |

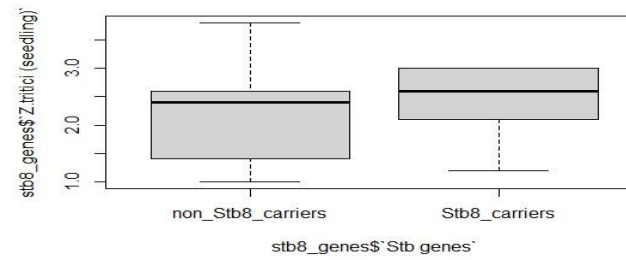

| Stb genes         | Z.tritici (seedling) |
|-------------------|----------------------|
| Stb8_carriers     | 2.52                 |
| non_Stb8_carriers | 2.16                 |
| P value           | 0.19                 |

**Supplementary Figure S4.** The general distribution of the Stb8 variable (A) and the boxplot for the Stb8 variable (B).

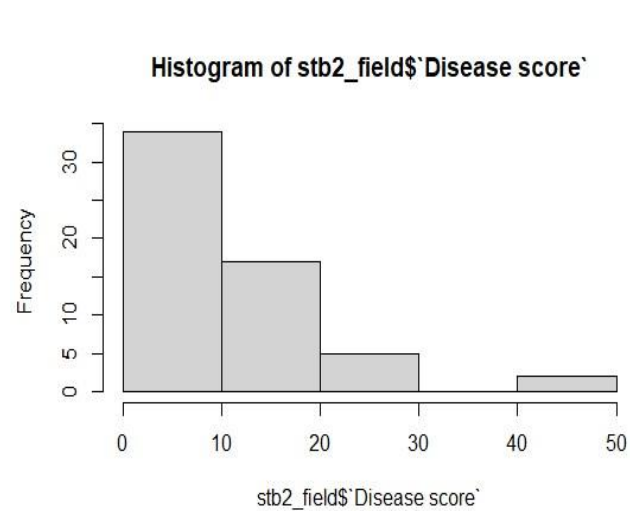

|         |      |
|---------|------|
| Min.    | 0.0  |
| 1st Qu. | 6.2  |
| Median  | 10.0 |
| Mean    | 13.5 |
| 3rd Qu. | 15.0 |
| Max.    | 50.0 |

A

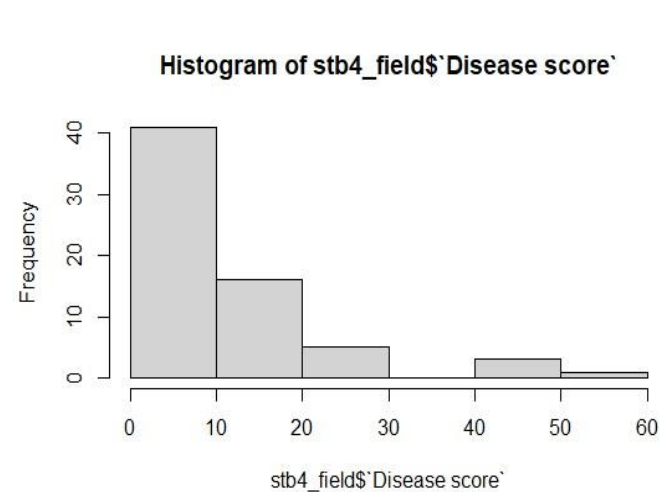

|         |      |
|---------|------|
| Min.    | 0.0  |
| 1st Qu. | 5.0  |
| Median  | 10.0 |
| Mean    | 14.1 |
| 3rd Qu. | 15.0 |
| Max.    | 50.0 |

B

**Supplementary Figure S5.** General distribution of Stb2 (A) and Stb4 (B) disease scores in the field.

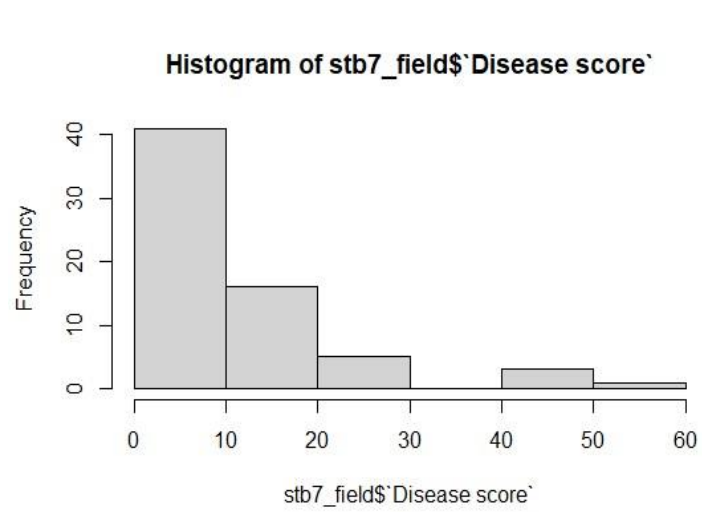

|         |      |
|---------|------|
| Min.    | 0.0  |
| 1st Qu. | 5.0  |
| Median  | 10.0 |
| Mean    | 14.1 |
| 3rd Qu. | 15.0 |
| Max.    | 60.0 |

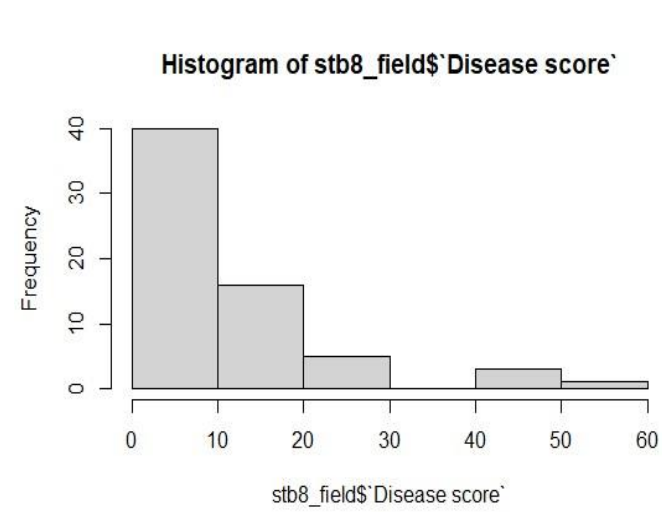

|         |      |
|---------|------|
| Min.    | 0.0  |
| 1st Qu. | 5.0  |
| Median  | 10.0 |
| Mean    | 14.1 |
| 3rd Qu. | 15.0 |
| Max.    | 6.0  |

**A** **B**  
**Supplementary Figure S6.** General distribution of Stb7 (A) and Stb8 (B) disease scores in the field.

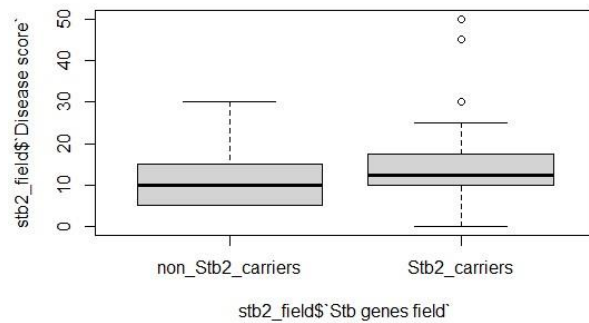

| Stb genes         | Z.tritici (field) |
|-------------------|-------------------|
| Stb2_carriers     | 15.7              |
| non_Stb2_carriers | 12.4              |
| P value           | 0.42              |

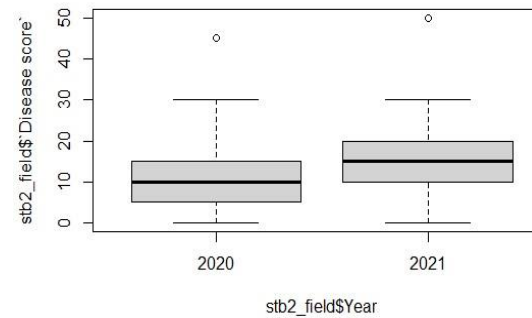

| Year    | Z.tritici (field) |
|---------|-------------------|
| 2020    | 11.4              |
| 2021    | 15.7              |
| P value | 0.01              |

**Supplementary Figure S7.** Boxplots of Stb2 and year disease scores (2020-2021) in the field.

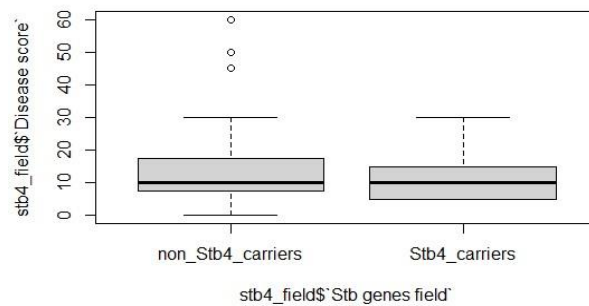

| Stb genes         | Z.tritici (field) |
|-------------------|-------------------|
| Stb4_carriers     | 11.1              |
| non_Stb4_carriers | 15.2              |
| P value           | 0.32              |

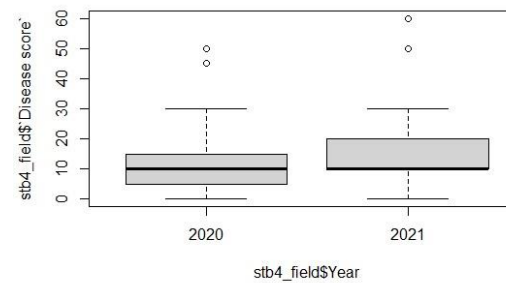

| Year    | Z.tritici (field) |
|---------|-------------------|
| 2020    | 11.8              |
| 2021    | 16.4              |
| P value | <0.01             |

**Supplementary Figure S8.** Boxplots of Stb4 and year disease scores (2020-2021) in the field.

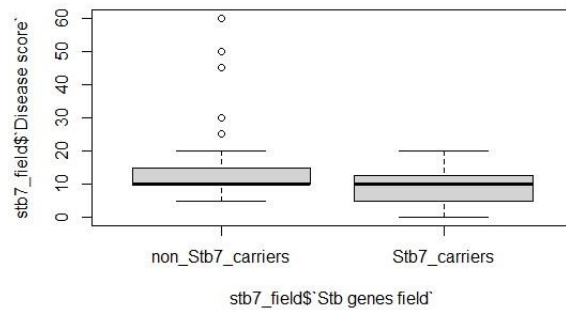

| Stb genes         | Z.tritici (field) |
|-------------------|-------------------|
| Stb7_carriers     | 9,2               |
| non_Stb7_carriers | 15.2              |
| P value           | 0.11              |

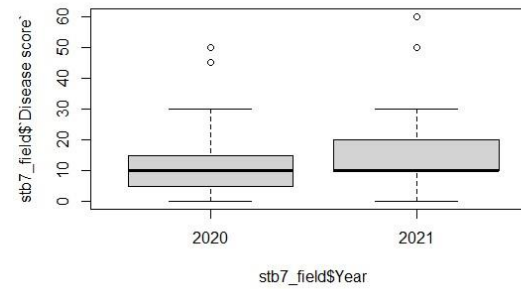

| Year    | Z.tritici (field) |
|---------|-------------------|
| 2020    | 11.8              |
| 2021    | 16.4              |
| P value | <0.01             |

**Supplementary Figure S9.** Boxplots of Stb7 and year disease scores (2020-2021) in the field.

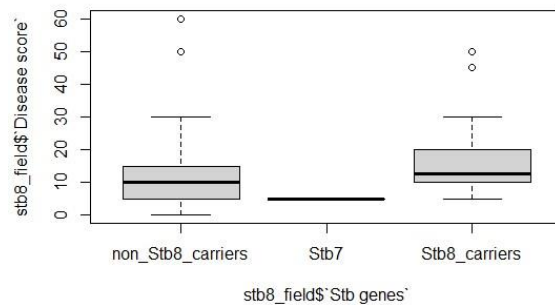

| Stb genes         | Z.tritici (field) |
|-------------------|-------------------|
| Stb8_carriers     | 16.1              |
| non_Stb8_carriers | 13.1              |
| P value           | 0.16              |

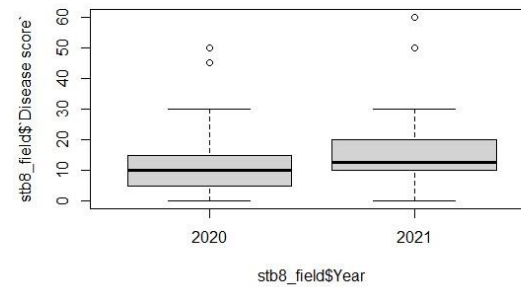

| Year    | Z.tritici (field) |
|---------|-------------------|
| 2020    | 11.8              |
| 2021    | 16.6              |
| P value | <0.01             |

**Supplementary Figure S10.** Boxplots of Stb8 and year disease scores (2020-2021) in the field.

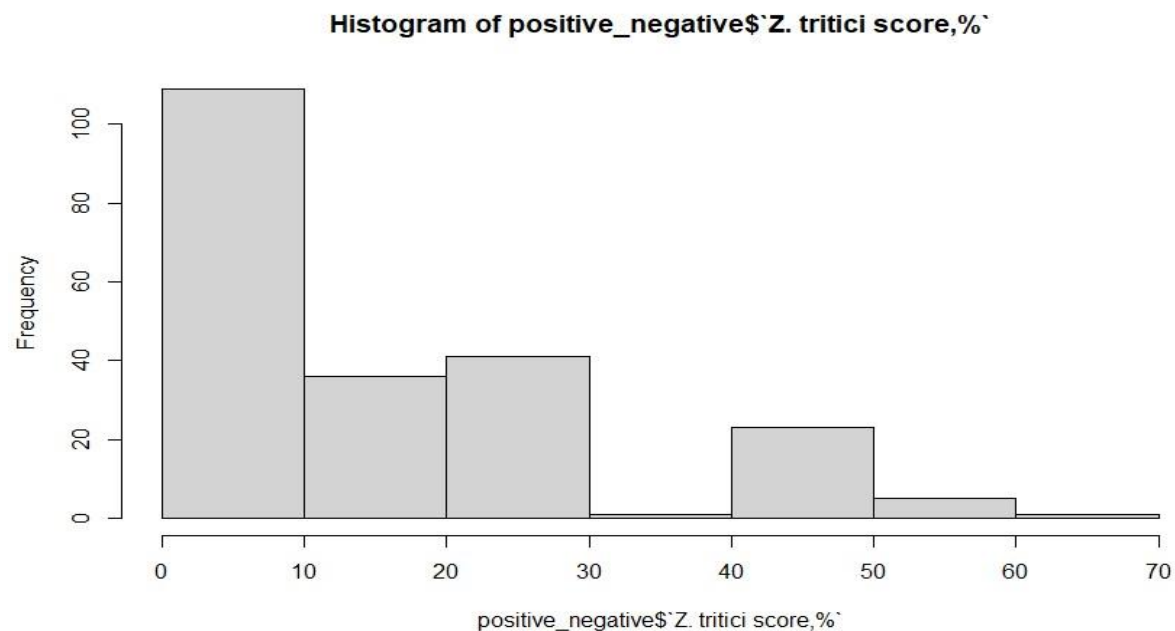

**Supplementary Figure S11.** The general distribution of variable severity of *Z. tritici* in positive and negative wheat samples concerning the presence/absence of *Stb* genes.

| Min. | 1st Qu | Median | Mean | 3rd Qu. | Max. |
|------|--------|--------|------|---------|------|
| 0.0  | 10.0   | 10.0   | 18.7 | 25.0    | 65.0 |

| Background | Average <i>Z. tritici</i> score, % |
|------------|------------------------------------|
| Negative   | 20,25                              |
| Positive   | 16,25                              |
| P value    | <0.01                              |

Detailed description of *Z. tritici* severity of wheat genotypes in positive (27 cvs) and negative (9 cvs) groups



| <i>Z. tritici</i> score, %            | Resistant groups | Number of Positive plants (%) | Number of Negative plants (%) |
|---------------------------------------|------------------|-------------------------------|-------------------------------|
| 0                                     | RR               | 19                            | 0                             |
| 5                                     | RR               | 23                            | 0                             |
| 10                                    | RR               | 22                            | 17                            |
| 15                                    | R                | 6                             | 5                             |
| 20                                    | R                | 5                             | 7                             |
| 25                                    | MS               | 8                             | 23                            |
| 30                                    | MS               | 1                             | 1                             |
| 45                                    | S                | 16                            | 47                            |
| Average disease score (P value <0.01) |                  | 20,25                         | 16,25                         |

Notes: According to the degree of damage to *Z. tritici*, the varieties were divided into the following groups: 0-10% – highly resistant (RR); 11-20% – resistant (R); 21-40% – moderately susceptible (MS); 41-100% – susceptible (S).
